# Supplementary material
Source: publisher figshare collection journal article supplement (https://acs.figshare.com/ndownloader/files/4044385)
Supplement: Supplementary file 1 [file 4044385]

# Supporting Information

## SELF-ASSEMBLY OF $N^3$ -SUBSTITUTED XANTHINES IN THE SOLID STATE AND AT THE SOLID-LIQUID INTERFACE

Artur Ciesielski,<sup>a</sup> Sébastien Haar,<sup>a</sup> Attila Bényei,<sup>b</sup> Gábor Paragi,<sup>c</sup> Célia Fonseca Guerra,<sup>d</sup> F. Matthias Bickelhaupt,<sup>d,e</sup> Stefano Masiero,<sup>f</sup> János Szolomájer,<sup>g</sup> Paolo Samori,<sup>\*,a</sup> Gian Piero Spada,<sup>\*,f</sup> Lajos Kovács<sup>\*,g</sup>

<sup>a</sup> Nanochemistry Laboratory, ISIS & icFRC, Université de Strasbourg & CNRS, 8 allée Gaspard Monge, 67000 Strasbourg, France.

<sup>b</sup> University of Debrecen, Department of Physical Chemistry, Egyetem tér 1, 4010 Debrecen, Hungary.

<sup>c</sup> Research Group of Supramolecular and Nanostructured Materials of the Hungarian Academy of Sciences, Dóm tér 8, 6720 Szeged, Hungary.

<sup>d</sup> Department of Theoretical Chemistry and Amsterdam Center for Multiscale Modeling (ACMM), VU University Amsterdam, De Boelelaan 1083, NL-1081 HV Amsterdam, The Netherlands.

<sup>e</sup> Radboud University Nijmegen, Institute for Molecules and Materials, Heyendaalseweg 135, NL-6525 AJ Nijmegen, The Netherlands.

<sup>f</sup> Alma Mater Studiorum – Università di Bologna, Dipartimento di Chimica “G. Ciamician” Via San Giacomo 11 – 40126 Bologna, Italy.

<sup>g</sup> University of Szeged, Department of Medicinal Chemistry, Dóm tér 8, 6720 Szeged, Hungary.

### Table of Contents

|                                                                                    |     |
|------------------------------------------------------------------------------------|-----|
| 1. NMR Spectroscopy and ESI study of $N^3$ -octadecylxanthine (compound <b>2</b> ) | S2  |
| 2. Polymeric structures based on $N^9$ -methylguanine                              | S6  |
| 3. X-ray powder patterns of $N^3$ -methylxanthine (compound <b>1</b> )             | S7  |
| 4. X-ray crystal structures of FADCUI and $N^3$ -methylxanthine ( <b>1</b> )       | S9  |
| 5. Theoretical studies                                                             | S13 |
| Figure S1                                                                          | S2  |
| Figure S2                                                                          | S3  |
| Figure S3                                                                          | S3  |
| Figure S4                                                                          | S4  |
| Figure S5                                                                          | S4  |
| Figure S6                                                                          | S5  |
| Figure S7                                                                          | S6  |
| Figure S8                                                                          | S7  |
| Figure S9                                                                          | S8  |
| Figure S10                                                                         | S11 |
| Figure S11                                                                         | S12 |
| Table S1                                                                           | S9  |
| Table S2                                                                           | S10 |
| Table S3                                                                           | S10 |
| Table S4                                                                           | S13 |

## 1. NMR Spectroscopy and ESI study of *N*<sup>3</sup>-octadecylxanthine (compound 2)

NMR spectra were recorded on a Varian Unity INOVA 600 MHz instrument equipped with a reverse probe. ESI-MS spectra were obtained with a Micromass ZMD-4000 spectrometer. Compound **2**, i.e. *N*<sup>3</sup>-octadecylxanthine was fully characterized by NMR. Signals were assigned on the basis of bidimensional spectra (Figs. S1-S5). Due to its low solubility, the compound was usually dissolved in high boiling solvents (DMSO or 1,1,2,2-tetrachloroethane) by heating, to improve *s/n* ratio.

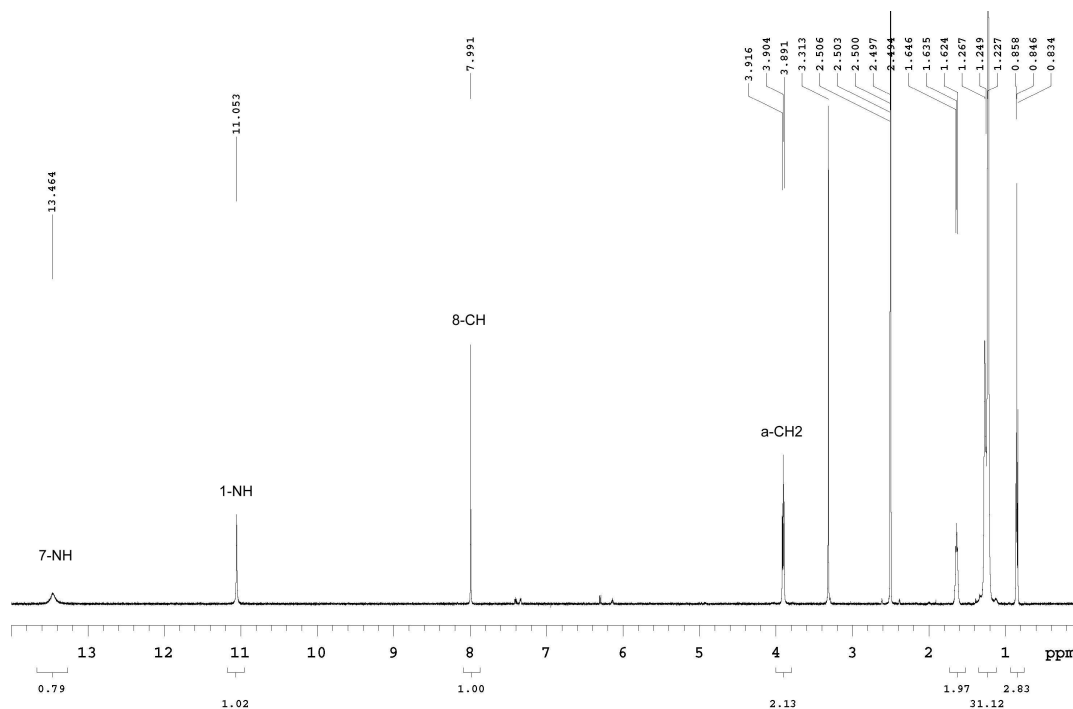

**Figure S1.** <sup>1</sup>H-NMR spectrum of compound **2** in DMSO-d<sub>6</sub> at r.t.

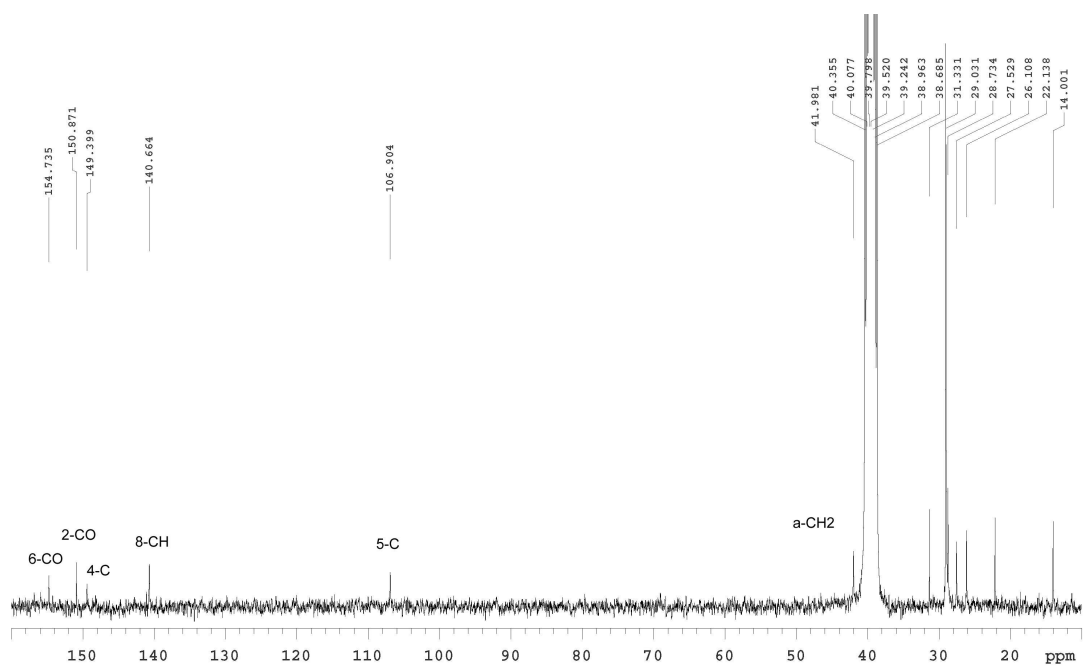

**Figure S2.** <sup>13</sup>C NMR spectrum of compound **2** in DMSO-d<sub>6</sub> at r.t.

1600 std parameters  
File:  
Temp. 40.0 C / 313.1 K  
Operator: sangiac  
INOVA-600 "RHEL"  
  
Relax. delay 1.000 sec  
Acq. time 0.213 sec  
Width 9611.9 Hz  
2D Width 9611.9 Hz  
4 repetitions  
256 increments  
OBSERVE H1, 599.7304205 MHz  
DATA PROCESSING  
Sine bell 0.107 sec  
F1 DATA PROCESSING  
Sine bell 0.027 sec  
FT size 4096 x 4096  
Total time 0 min 0 sec

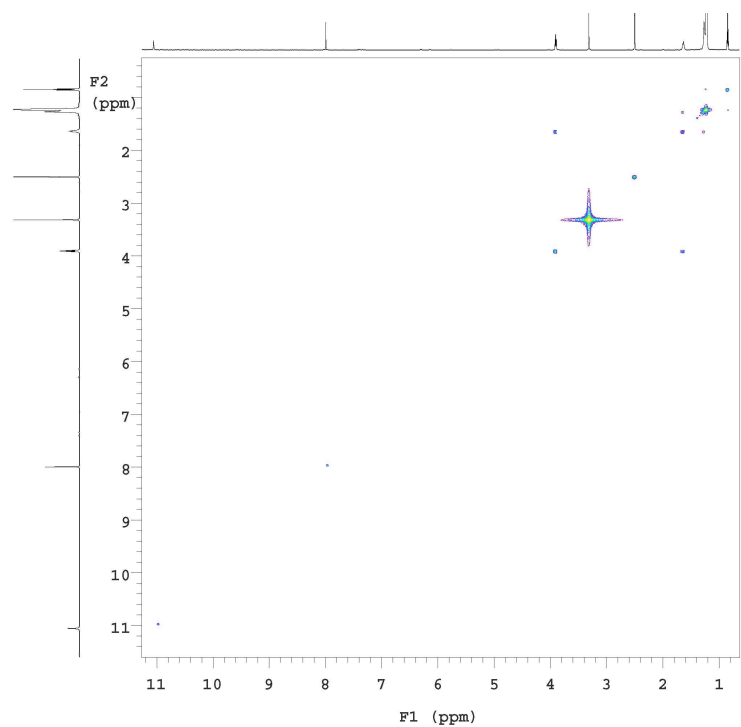

**Figure S3.** COSY spectrum of compound **2** in DMSO-d<sub>6</sub> at 40 °C

i600 std parameters

File:

Temp. 50.0 C / 323.1 K  
Operator: sangiac  
INOVA-600 "RHEL"

Relax. delay 1.000 sec  
Mixing 0.500 sec  
Acq. time 0.230 sec  
Width 9611.9 Hz  
2D Width 25632.8 Hz  
64 repetitions

2 x 256 increments  
OBSERVE H1, 599.7304197 MHz  
DECOUPLE C13, 150.8136483 MHz  
Power 43 dB  
on during acquisition  
off during delay  
W40\_Triple modulated  
DATA PROCESSING  
Gauss apodization 0.106 sec  
F1 DATA PROCESSING  
Gauss apodization 0.005 sec  
FT size 8192 x 2048  
Total time 0 min 0 sec

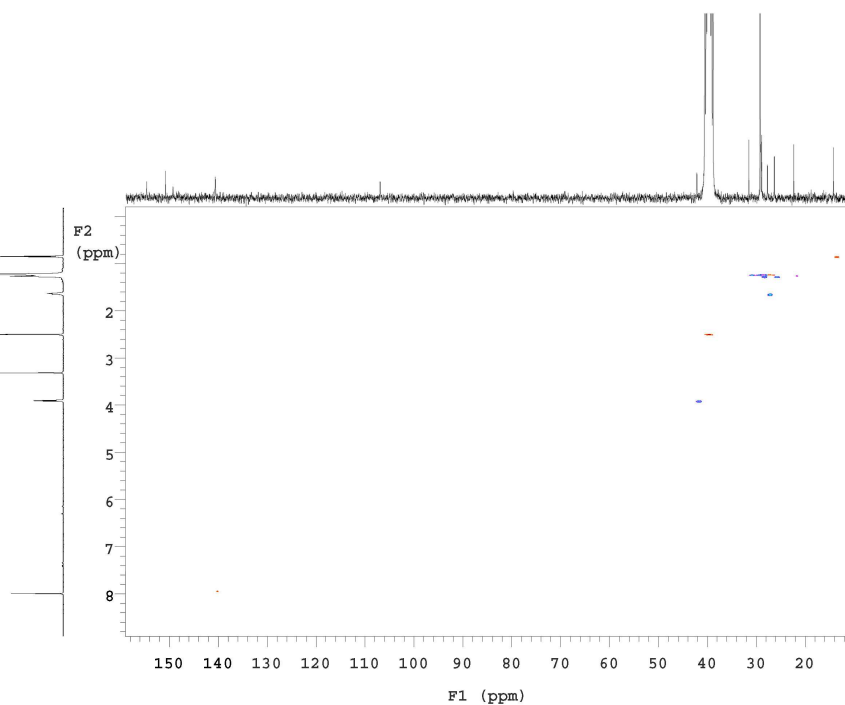

**Figure S4.** HSQC spectrum of compound **2** in DMSO- $d_6$  at 50 °C

i600 std parameters

File:

Temp. 40.0 C / 313.1 K  
Operator: sangiac  
INOVA-600 "RHEL"

Relax. delay 1.500 sec  
Mixing 0.080 sec  
Acq. time 0.128 sec  
Width 9611.9 Hz  
2D Width 36199.1 Hz  
64 repetitions

256 increments  
OBSERVE H1, 599.7304111 MHz  
DATA PROCESSING  
Sine bell 0.064 sec  
F1 DATA PROCESSING  
Sine bell 0.007 sec  
FT size 4096 x 2048  
Total time 0 min 0 sec

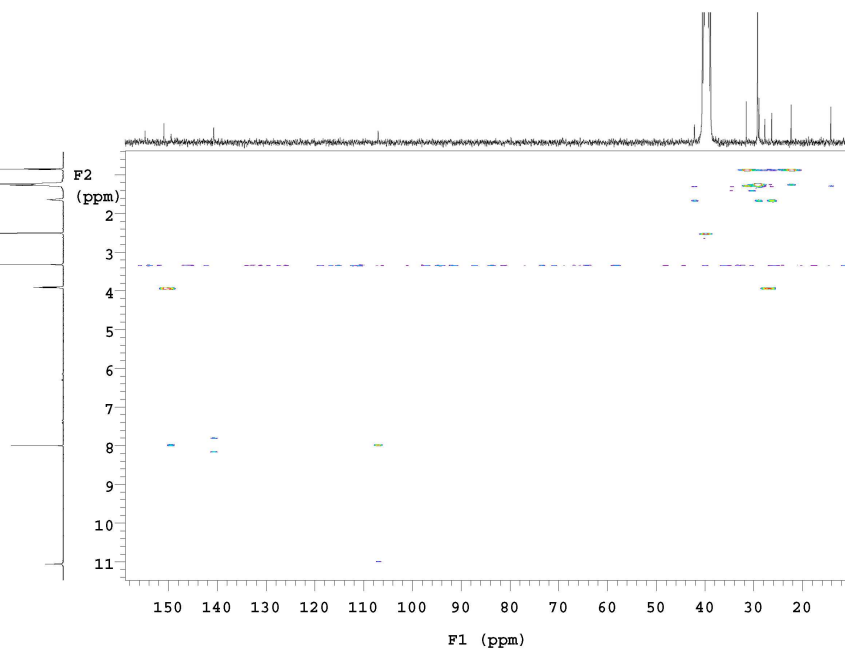

**Figure S5.** HMBC spectrum of compound **2** in DMSO- $d_6$  at 40 °C

Although no specific H-bonding pattern could be demonstrated by NMR investigations, some clues for the existence of H-bonded species (dimers or oligomers) in solution can be inferred. For instance, . 7-NH, 1-NH and H-8 peaks move upfield with temperature both in  $\text{CD}_2\text{Cl}_4$  and in  $\text{DMSO-d}_6$  (Fig. S6).

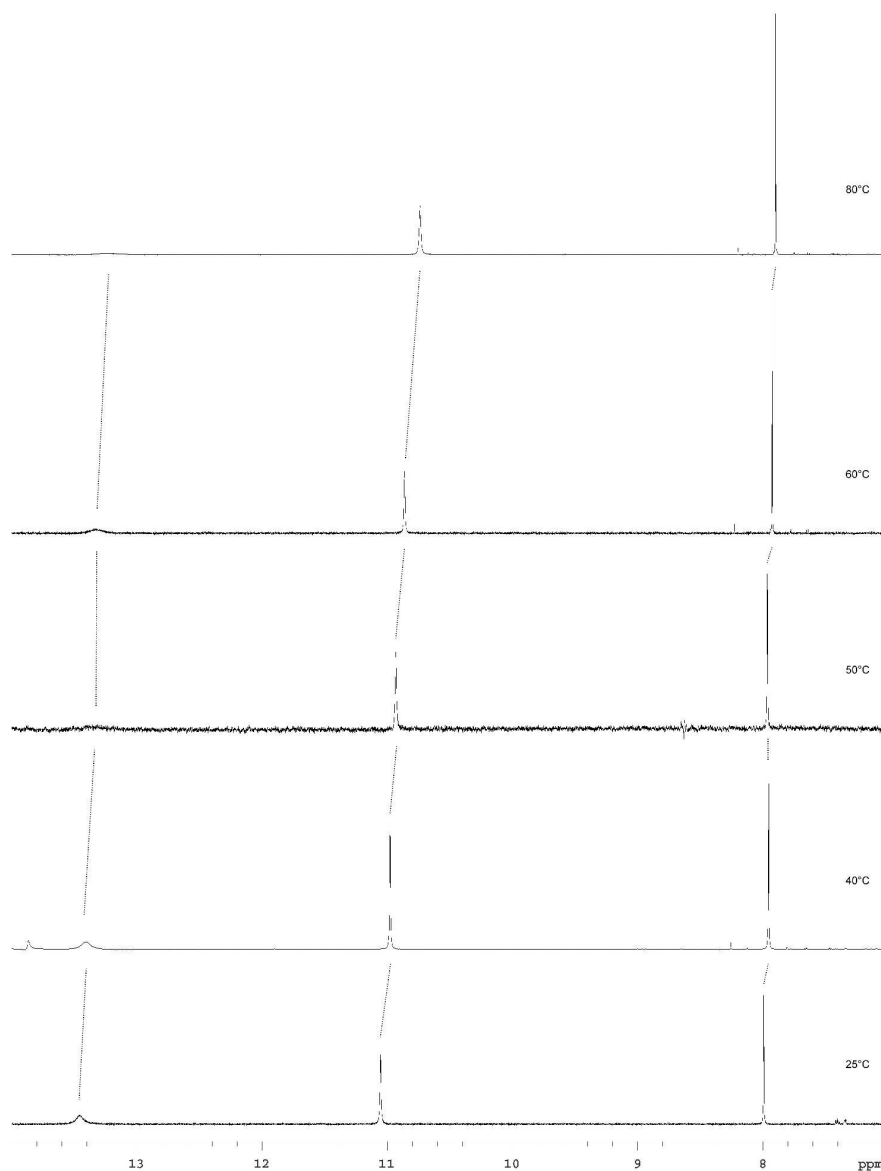

**Figure S6.** Downfield portion of  $^1\text{H}$ -NMR spectra of compound **2** in  $\text{DMSO-d}_6$  at different temperatures.

The ESI-MS (positive mode) spectrum of **2** in C<sub>2</sub>H<sub>2</sub>Cl<sub>4</sub>/CHCl<sub>3</sub> solution shows as the main peaks signals corresponding to [(**2**)Na]<sup>+</sup>, [(**2**)<sub>2</sub>Na]<sup>+</sup>, [(**2**)<sub>3</sub>Na]<sup>+</sup> and [(**2**)<sub>4</sub>Na]<sup>+</sup>. The relative intensity of the last two peaks is indicative of the attitude of **2** to form ion-templated X-quartets (Fig. S7).

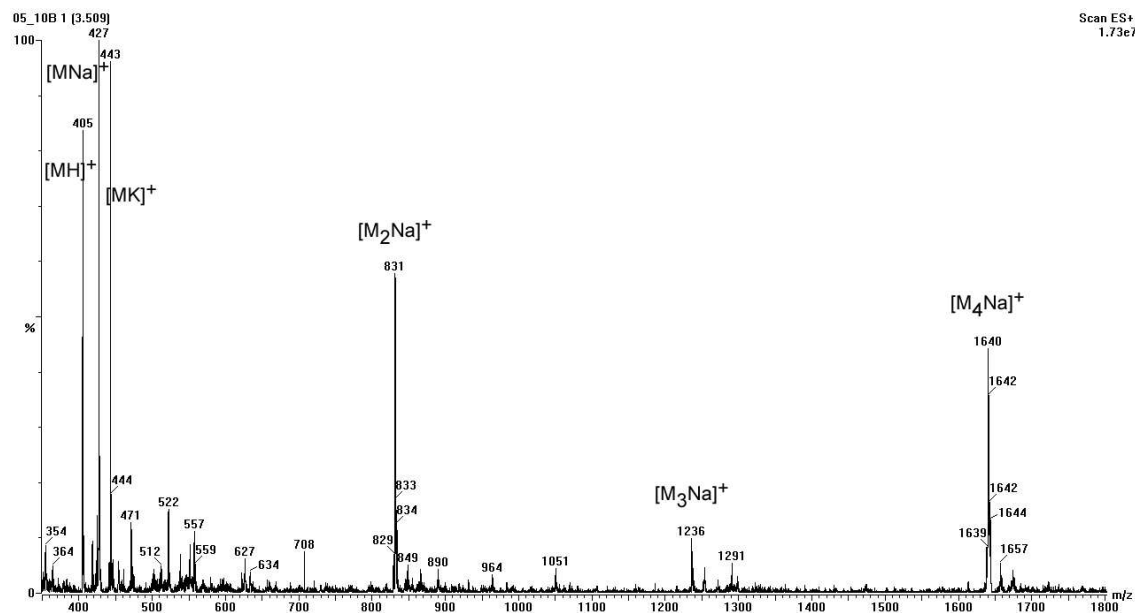

**Figure S7.** ESI-MS (positive mode) of compound **2** in C<sub>2</sub>H<sub>2</sub>Cl<sub>4</sub>/CHCl<sub>3</sub> solution (with a small amount of formic acid added).

## 2. Polymeric structures based on $N^9$ -methylguanine

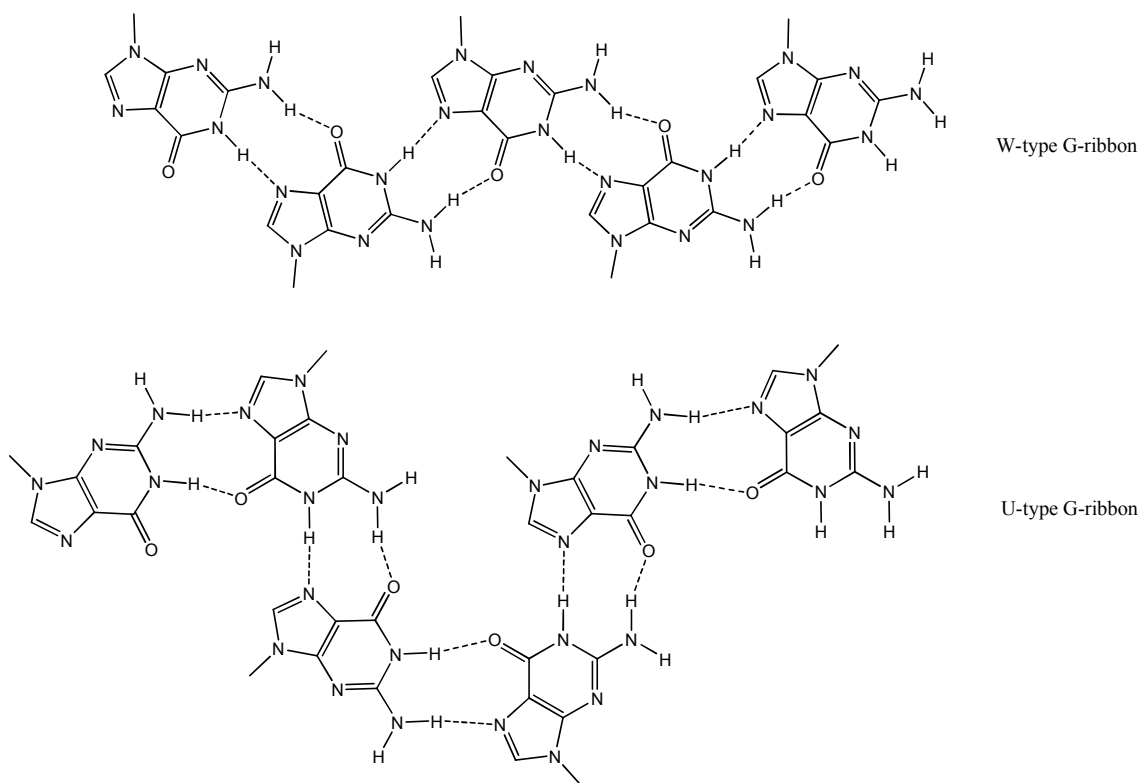

**Figure S8.** Schematic representation of the  $N^9$ -methylguanine in its W and U ribbon assembly.

### 3. X-ray powder patterns $N^3$ -methylxanthine (compound 1)

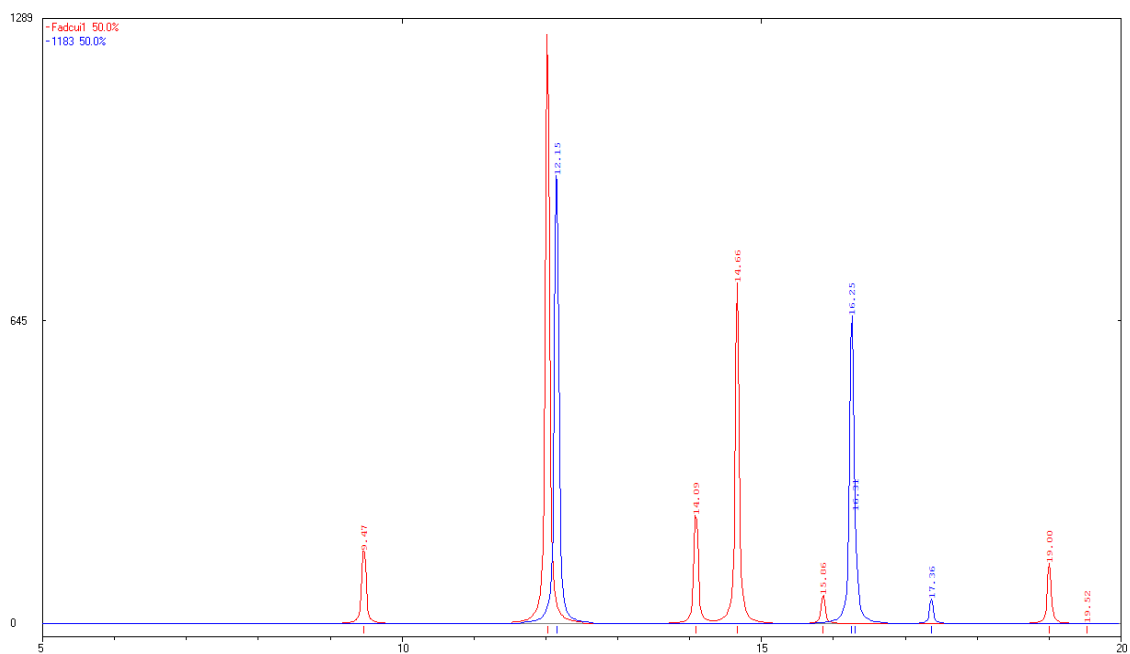

**Figure S9.** The calculated X-ray powder pattern for the literature (red) and the new polymorphic structure (blue) of  $N^3$ -methylxanthine (compound 1).<sup>1</sup>



#### 4. X-ray crystal structures of FADCUI and $N^3$ -methylxanthine (1)

**Table S1.** Crystallographic data and structure refinement results for  $N^3$ -methylxanthine (1).

|                                                                        |                             |
|------------------------------------------------------------------------|-----------------------------|
| Name                                                                   | $N^3$ -methylxanthine       |
| Formula                                                                | $C_6H_6N_4O_2$              |
| Formula weight                                                         | 166.15                      |
| Crystal system                                                         | Orthorhombic                |
| Space group                                                            | Pc2 <sub>1</sub> b (No. 29) |
| $a / \text{\AA}$                                                       | 5.449(5)                    |
| $b / \text{\AA}$                                                       | 8.160(5)                    |
| $c / \text{\AA}$                                                       | 14.558(5)                   |
| $V / \text{\AA}^3$                                                     | 647.3(7)                    |
| $Z$                                                                    | 4                           |
| $D_c / \text{g cm}^{-3}$                                               | 1.705                       |
| $F(000)$                                                               | 344                         |
| $\mu / \text{mm}^{-1}$                                                 | 0.13                        |
| Reflections collected                                                  | 1125                        |
| Unique reflections with $I > 2\sigma(I)$ ,                             | 785                         |
| Parameters refined                                                     | 116                         |
| GOF on $F^2$                                                           | 1.17                        |
| $R[F^2 > 2\sigma(F^2)]$                                                | 0.097                       |
| $wR(F^2)$                                                              | 0.238                       |
| $\Delta\rho_{\text{max}}, \Delta\rho_{\text{min}} / \text{e \AA}^{-3}$ | 0.35, -0.37                 |

**Table S2.** Bond length data for the new polymorph and the literature structure (FADCUI)<sup>1</sup> of *N*<sup>3</sup>-methylxanthine.

|         | New<br>polymorph | FADCUI |
|---------|------------------|--------|
| C2 - O2 | 1.214(9)         | 1.218  |
| C2 - N3 | 1.367(12)        | 1.364  |
| C2 - N1 | 1.389(10)        | 1.389  |
| C4 - C5 | 1.324(10)        | 1.370  |
| C4 - N9 | 1.327(10)        | 1.341  |
| C4 - N3 | 1.392(9)         | 1.381  |
| C5 - N7 | 1.385(9)         | 1.372  |
| C5 - C6 | 1.457(14)        | 1.397  |
| C6 - O6 | 1.222(10)        | 1.225  |
| C6 - N1 | 1.373(10)        | 1.382  |
| C8 - N7 | 1.319(12)        | 1.323  |
| C8 - N9 | 1.344(9)         | 1.326  |
| C9 - N3 | 1.469(9)         | 1.468  |
| N1 - H1 | 0.86(2)          | 0.891  |
| N7 - H7 | 0.87(2)          | 0.838  |

**Table S3.** Hydrogen-bond geometry of the new polymorph of *N*<sup>3</sup>-methylxanthine (**1**).

| <i>D</i> —H $\cdots$ <i>A</i>     | <i>D</i> —H (Å) | H $\cdots$ <i>A</i> (Å) | <i>D</i> $\cdots$ <i>A</i> (Å) | <i>D</i> —H $\cdots$ <i>A</i> (°) |
|-----------------------------------|-----------------|-------------------------|--------------------------------|-----------------------------------|
| NH(1) $\cdots$ N(9) <sup>i</sup>  | 0.86            | 2.18                    | 3.010 (10)                     | 163                               |
| NH(7) $\cdots$ O(2) <sup>ii</sup> | 0.87 (2)        | 1.97 (5)                | 2.774 (9)                      | 154 (10)                          |

Symmetry codes: (i)  $x+1, y+1/2, -z+1/2$ ; (ii)  $-x+2, y, z-1/2$ .

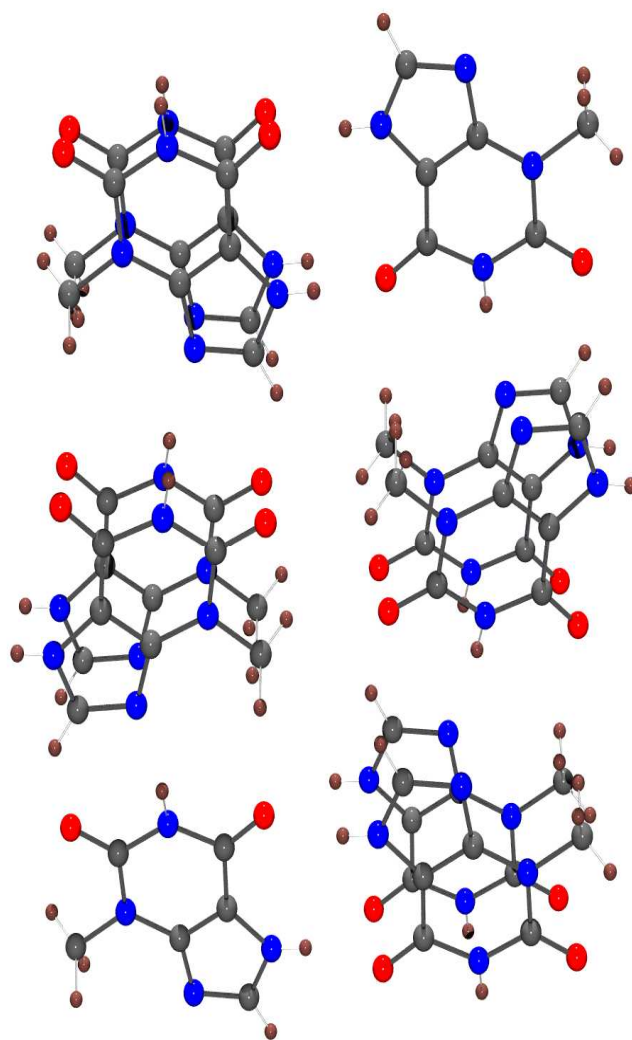

**Figure S10.** Stacking motif in FADCUI X-ray structure showing the parallel orientation of alternating rings. View normal to (100).

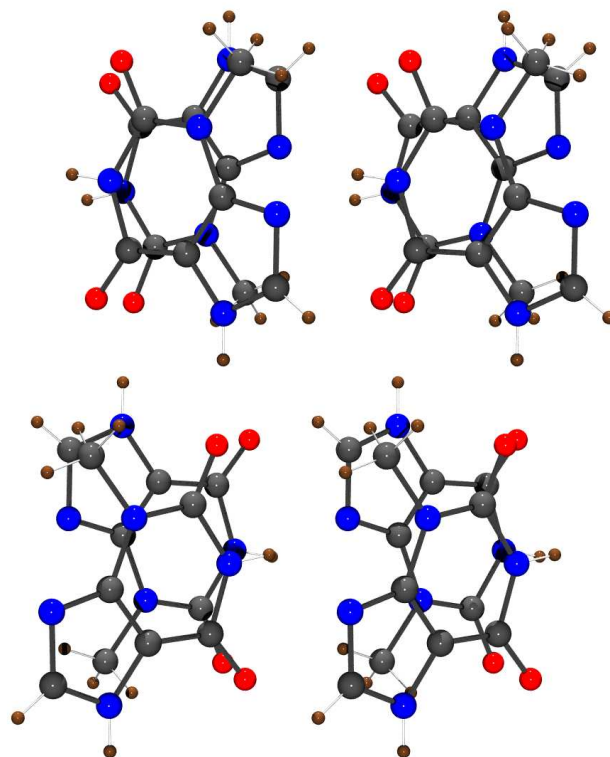

**Figure S11.** Stacking motif in new polymorph of **1** showing the rotated orientation of alternating rings. View normal to (010)

## 5. Theoretical studies

**Table S4.** Calculated (BLYP-D/TZ2P level of theory) total bonding energies and average H-bonding energies (in kcal/mol) of 4, 6, 8, 10 and 12 units long optimized X and G ribbons.

| no. of units in ribbon | Total bonding energies (in kcal/mol) |        |        |        | Average stabilization energies (in kcal/mol) per H-bond. |      |       |       |
|------------------------|--------------------------------------|--------|--------|--------|----------------------------------------------------------|------|-------|-------|
|                        | X-W                                  | X-U    | G-W    | G-U    | X-W                                                      | X-U  | G-W   | G-U   |
| 4                      | -58.5                                | -57.7  | -66.1  | -64.8  | -9.8                                                     | -9.6 | -11   | -10.8 |
| 6                      | -95.2                                | -95.2  | -114.3 | -116.5 | -9.5                                                     | -9.5 | -11.4 | -11.7 |
| 8                      | -131.7                               | -128   | -162.9 | -165.3 | -9.4                                                     | -9.1 | -11.6 | -11.8 |
| 10                     | -169.1                               | -169.6 | -211.8 | -213.7 | -9.4                                                     | -9.4 | -11.8 | -11.9 |
| 12                     | -204.9                               | -205.3 | -260.5 | -262.5 | -9.3                                                     | -9.3 | -11.8 | -11.9 |

X –  $N^3$ -methylxanthine, G –  $N^9$ -methylguanine, W and U – types of H-bonded ribbon.

### References:

1. Low, J. N.; Tollin, P.; Brand, E.; Wilson, C. C., Structure of 3-Methylxanthine. *Acta Cryst. Sect. C* **1986**, 42, 1447-1448.
